# Supplementary material
Source: MDPI journal article supplement (https://www.mdpi.com/1424-8247/14/10/954)
Supplement: s1 [file s1]

# Supplementary Material

## Molecular modeling

**Table S1.** Calculated binding energy values for the computed interaction between studied compounds and the target proteins.

|                | RBD (-kcal/mol) | ACE2 (-kcal/mol) |
|----------------|-----------------|------------------|
| Amodiaquine    | 6.2             | 7.4              |
| Artemiside     | 6.9             | 7.6              |
| Artemisone     | 7.1             | 8.1              |
| Artesunate     | 6.6             | 7.8              |
| Curcumin       | 6.0             | 9.0              |
| Mefloquine     | 7.0             | 7.9              |
| Methylene blue | 6.1             | 7.8              |
| Pyronaridine   | 7.3             | 9.0              |
| Quinine        | 6.0             | 9.0              |

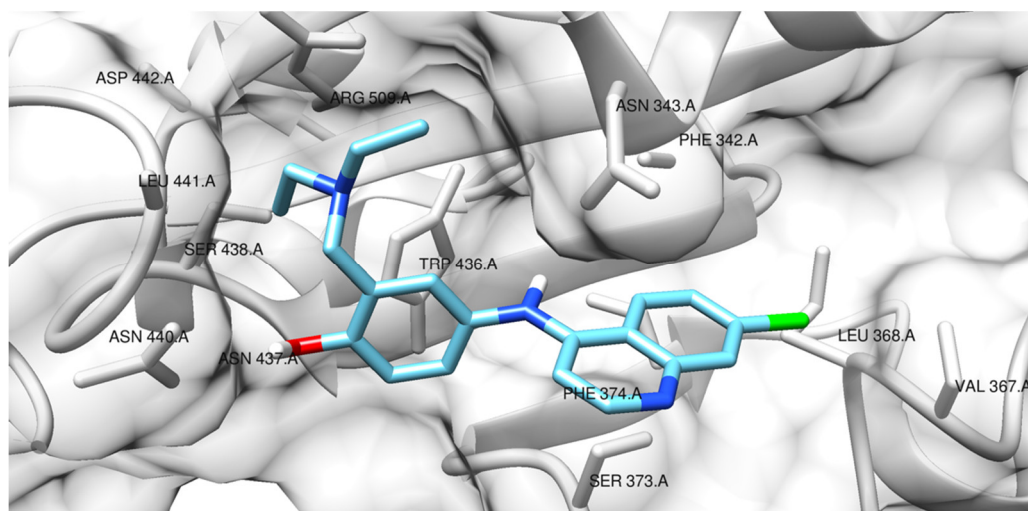

**Figure S1.** Detailed view of the predicted interaction motif of amodiaquine with RBD.

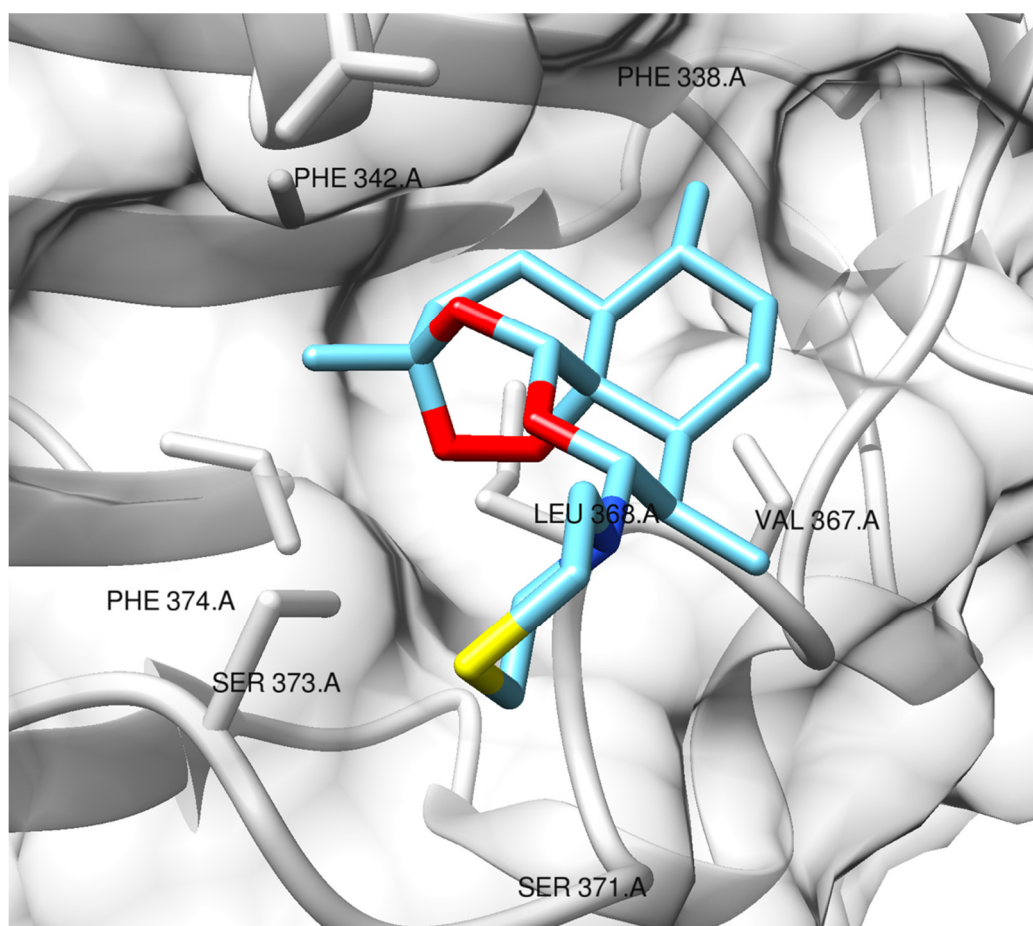

**Figure S2.** Detailed view of the predicted interaction motif of artemiside with RBD.

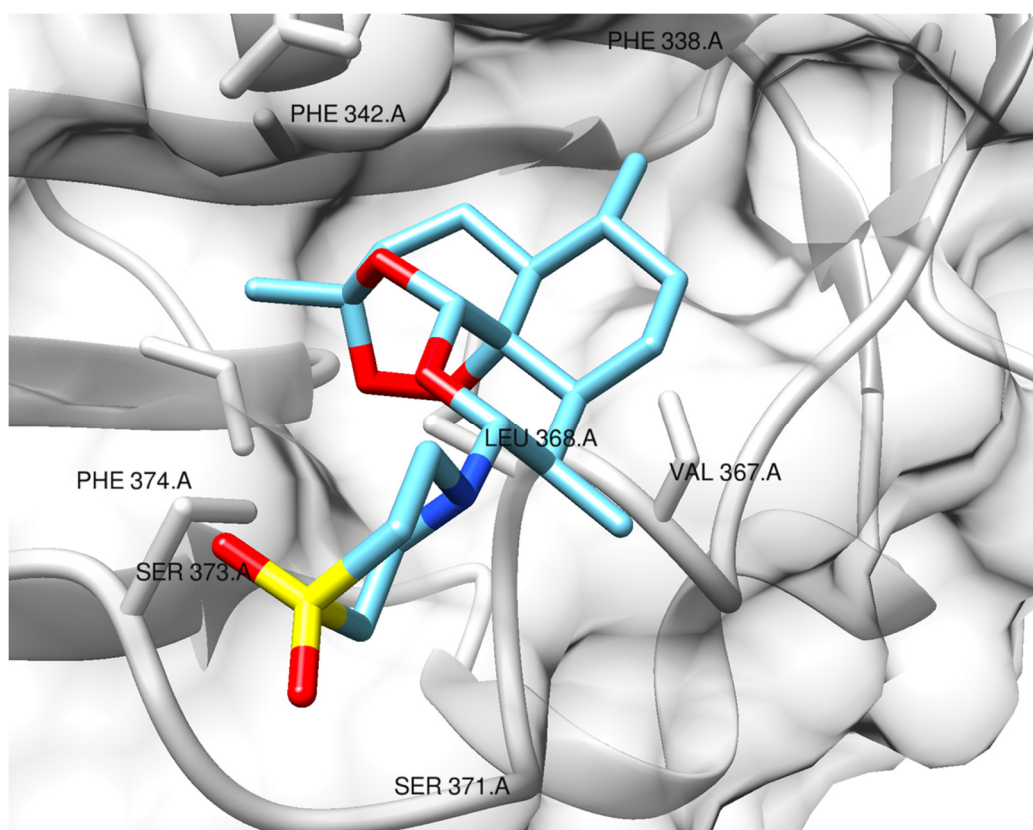

**Figure S3.** Detailed view of the predicted interaction motif of artemisone with RBD.

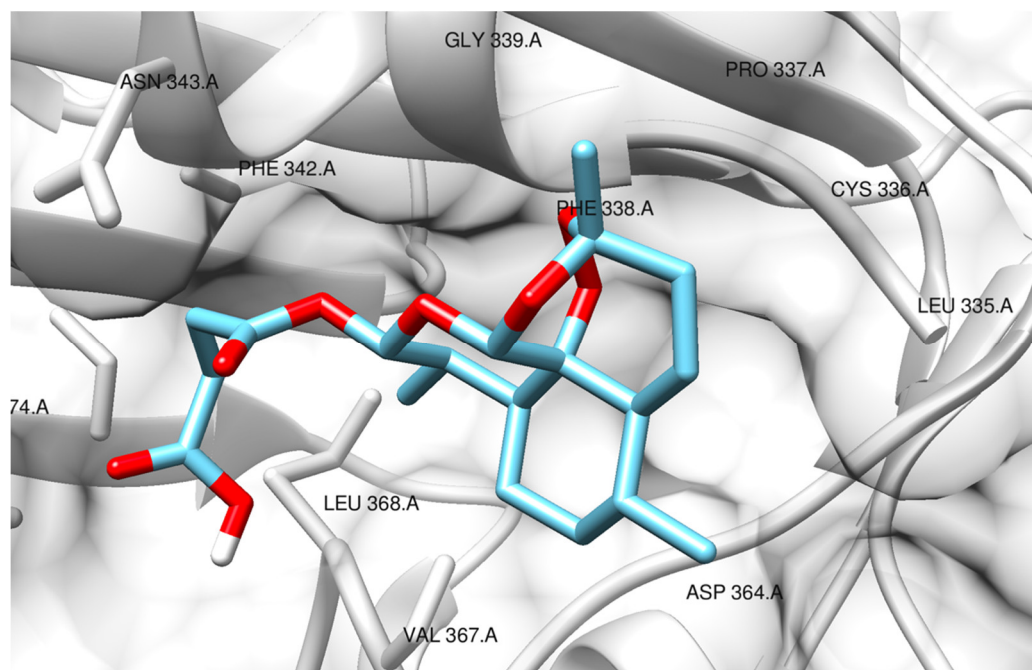

**Figure S4.** Detailed view of the predicted interaction motif of artesunate with RBD.

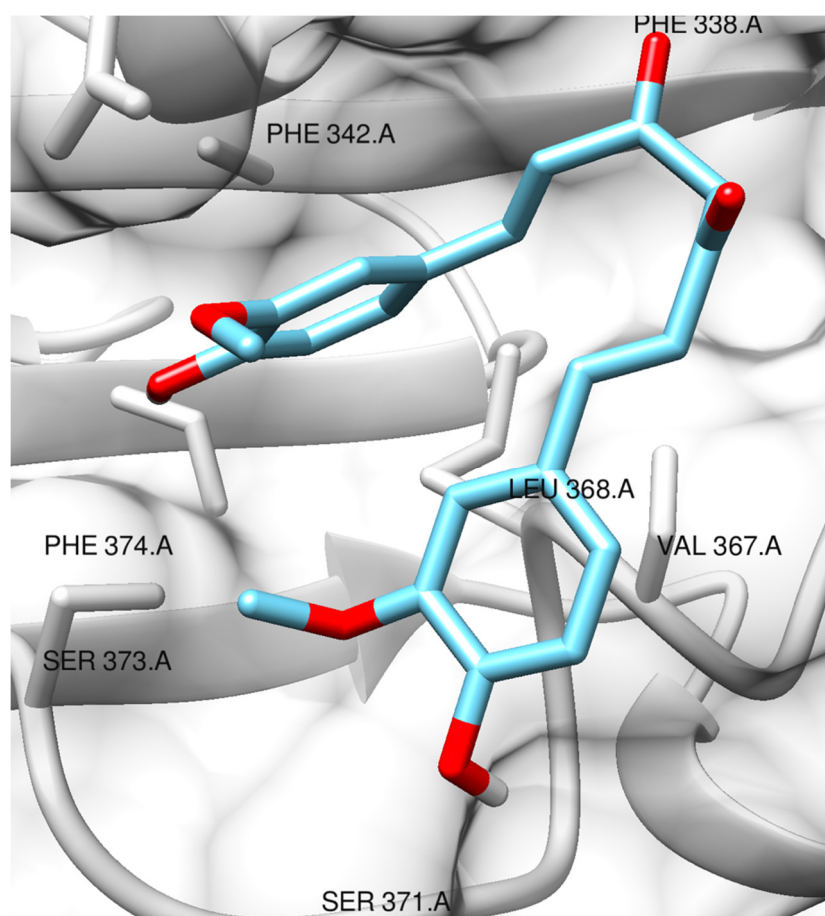

**Figure S5.** Detailed view of the predicted interaction motif of curcumin with RBD.

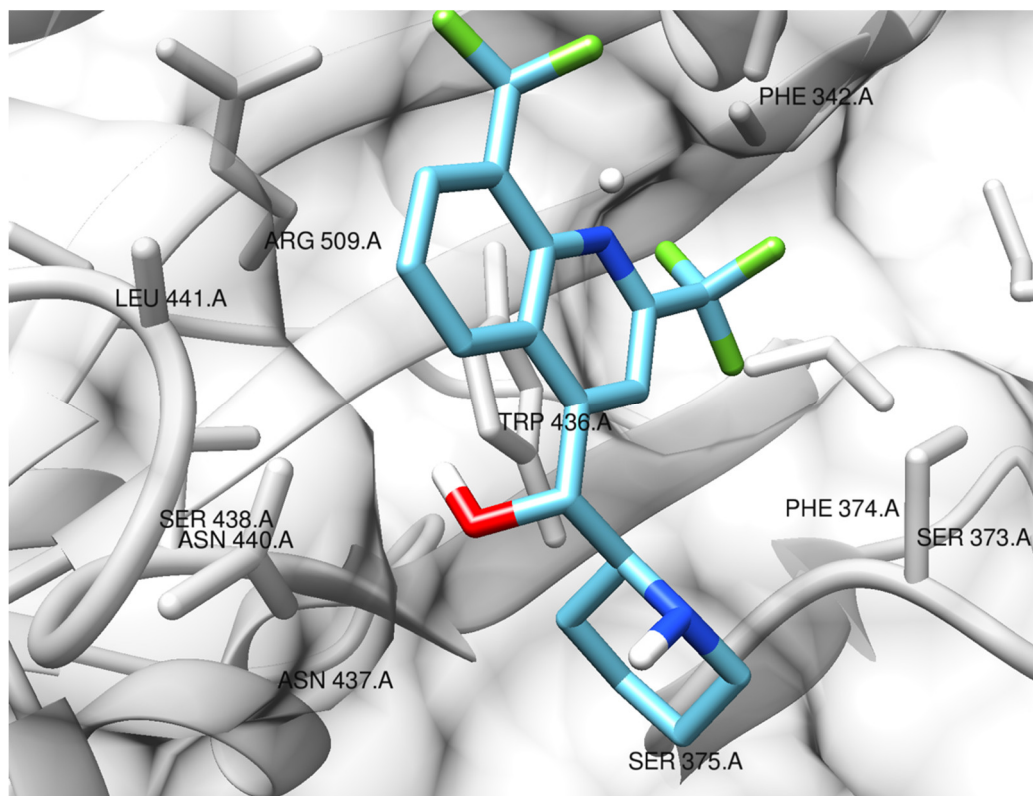

**Figure S6.** Detailed view of the predicted interaction motif of mefloquine with RBD.

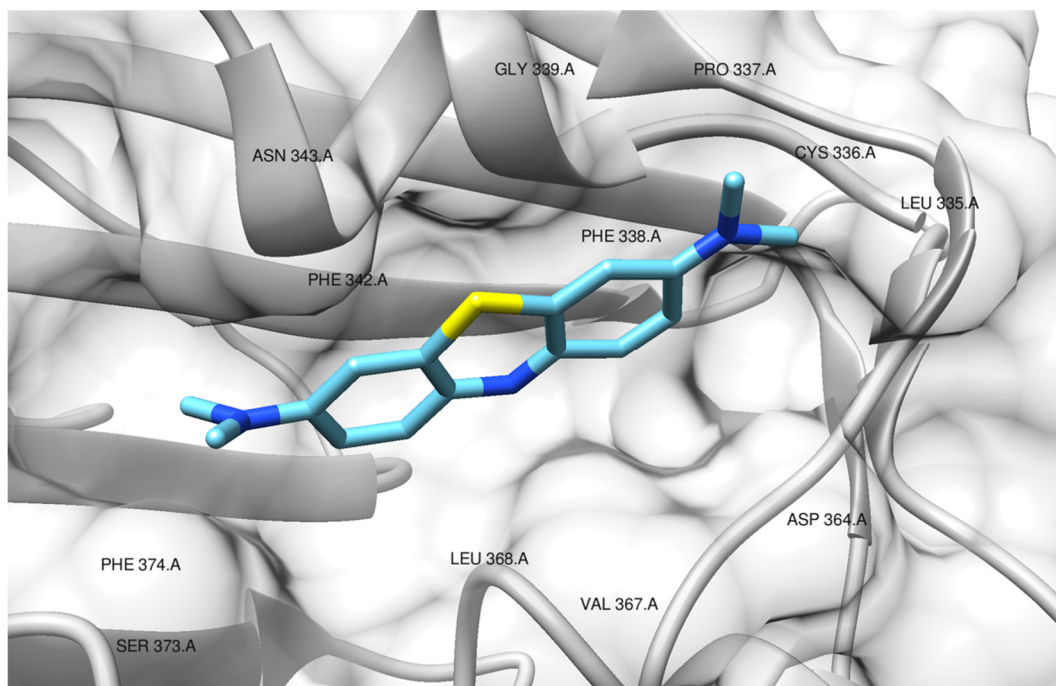

**Figure S7.** Detailed view of the predicted interaction motif of methylene blue with RBD.



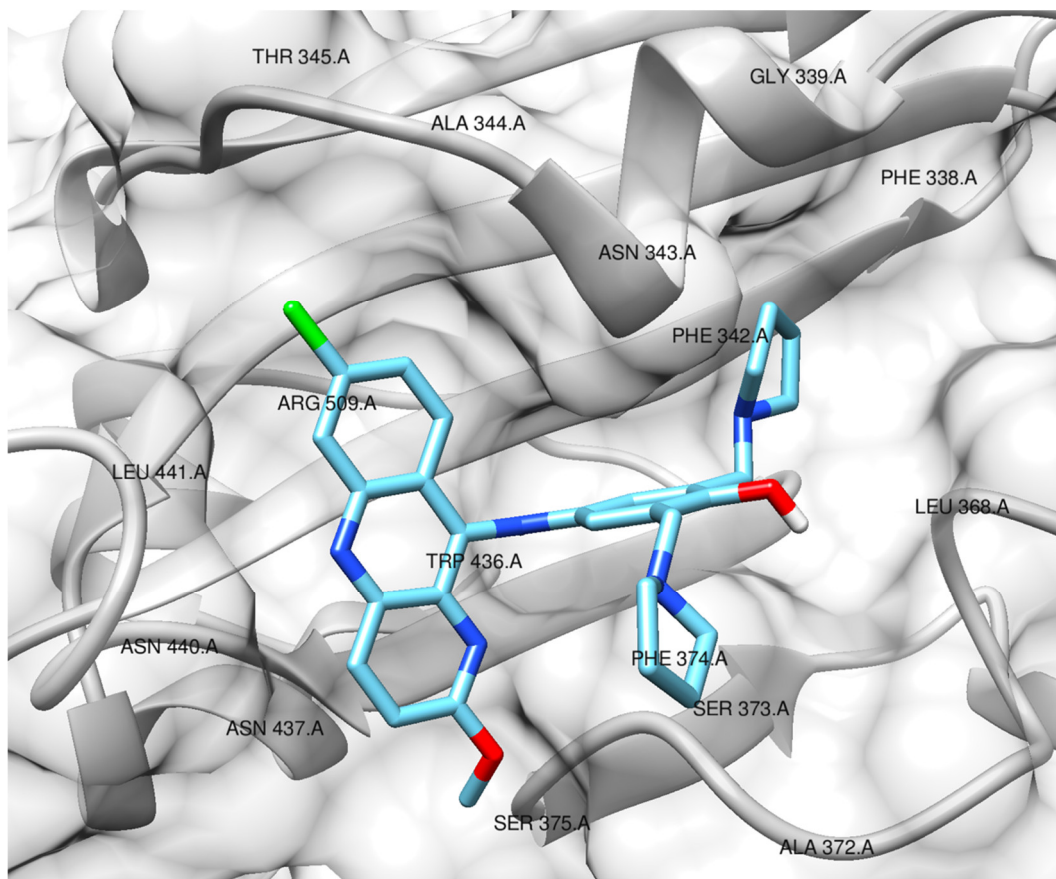

**Figure S8.** Detailed view of the predicted interaction motif of pyronaridine with RBD.

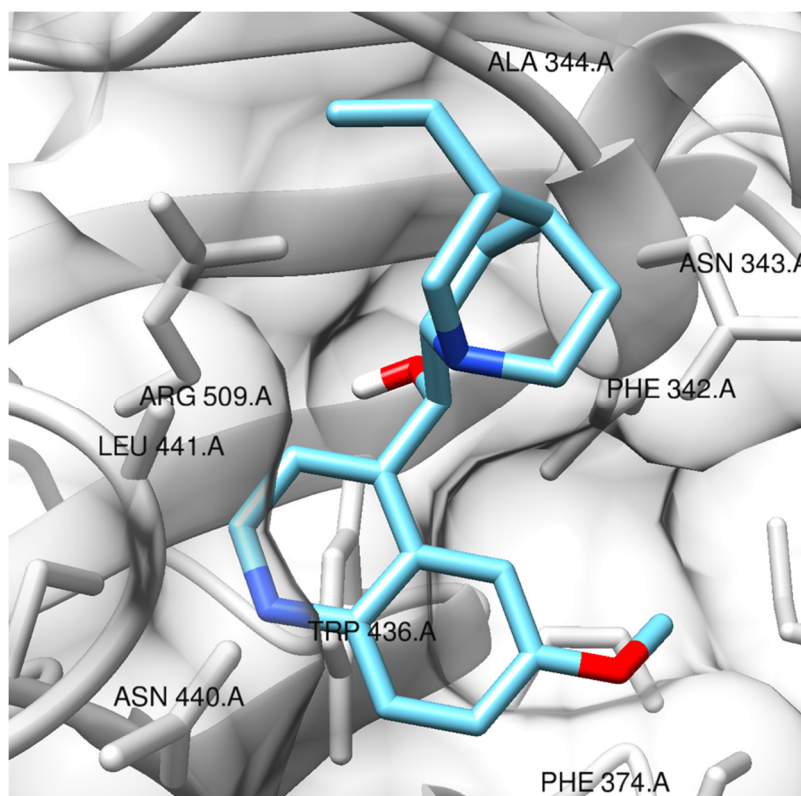

**Figure S9.** Detailed view of the predicted interaction motif of quinine with RBD.

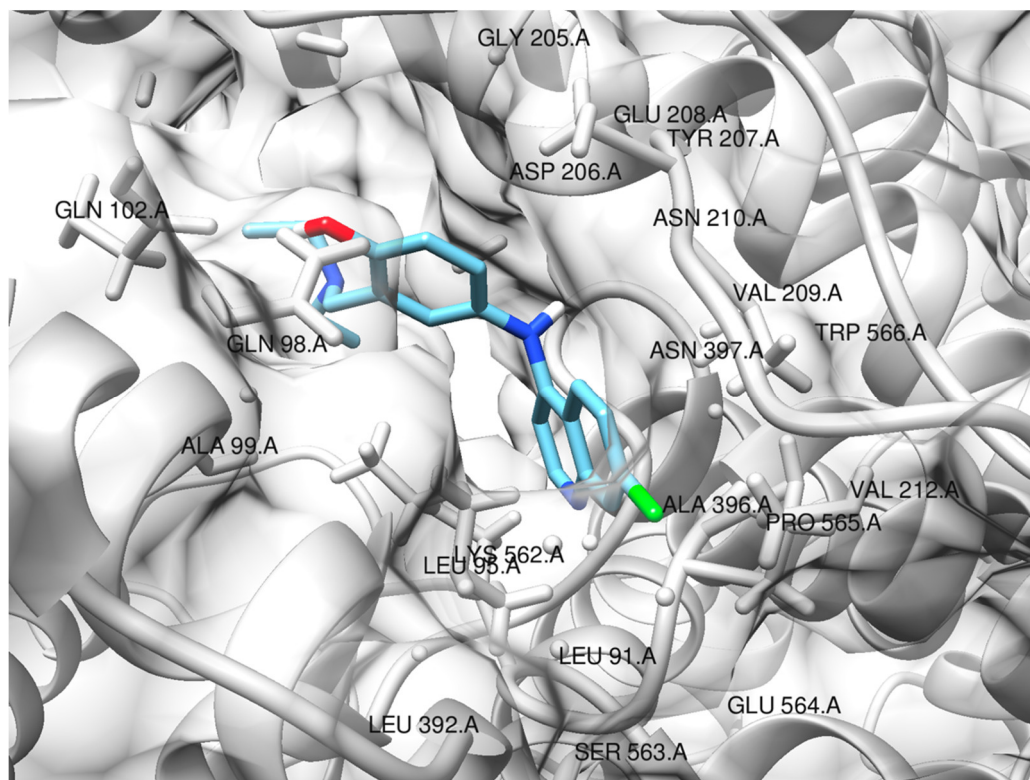

**Figure S10.** Detailed view of the predicted interaction motif of amodiaquine with ACE2.

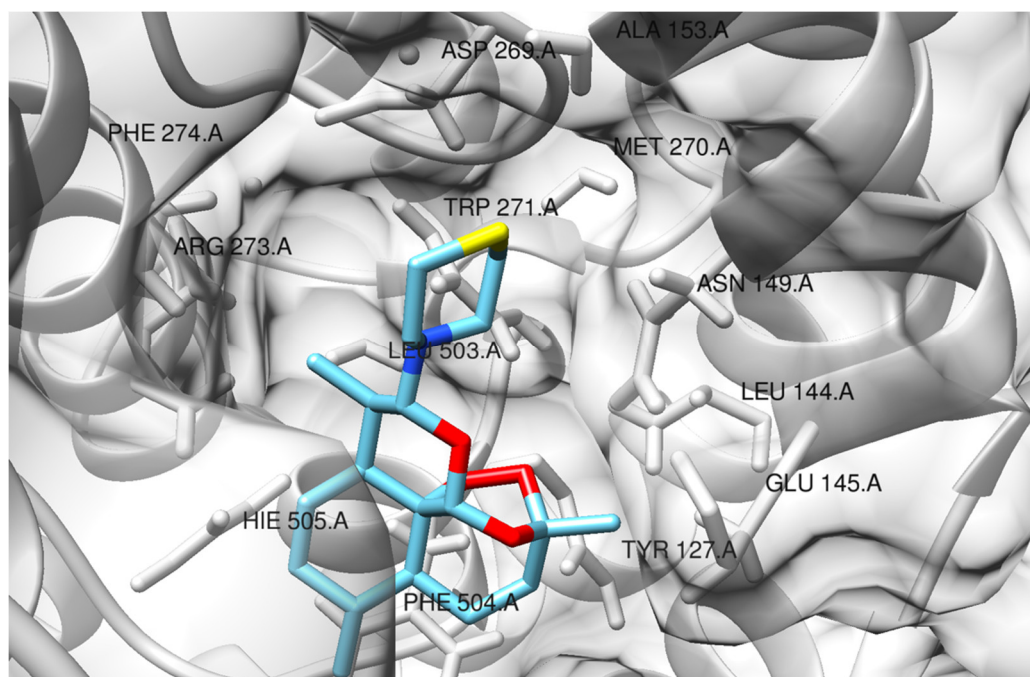

**Figure S11.** Detailed view of the predicted interaction motif of artemiside with ACE2.

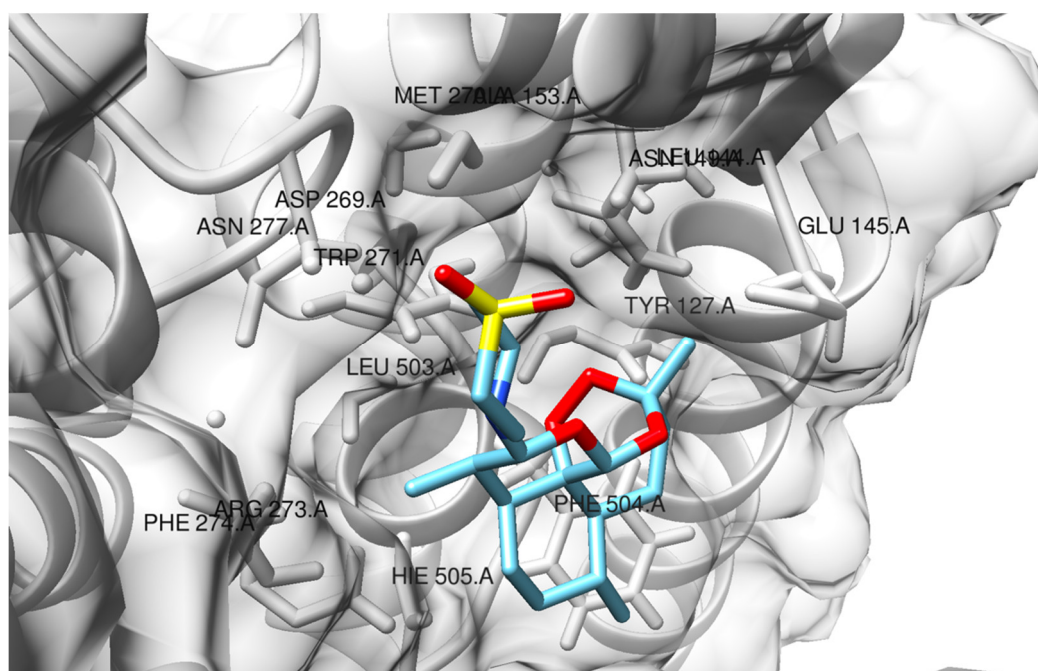

**Figure S12.** Detailed view of the predicted interaction motif of artemisone with ACE2.

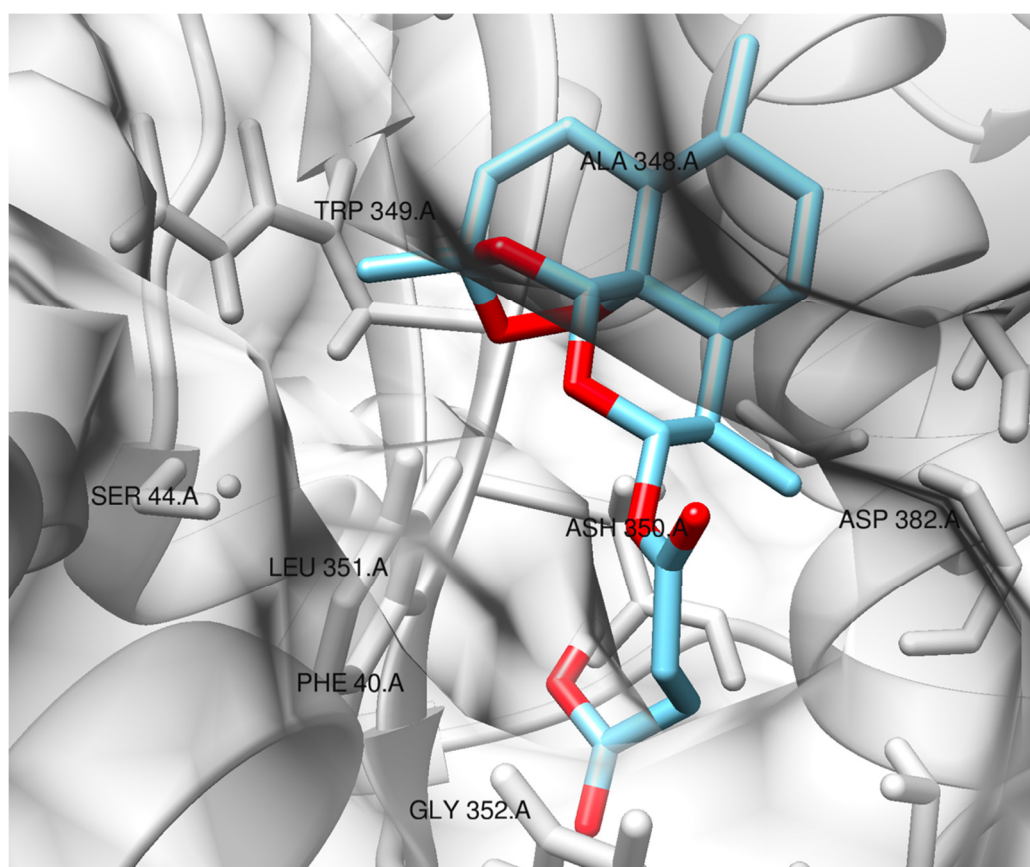

**Figure S13.** Detailed view of the predicted interaction motif of artesunate with ACE2.



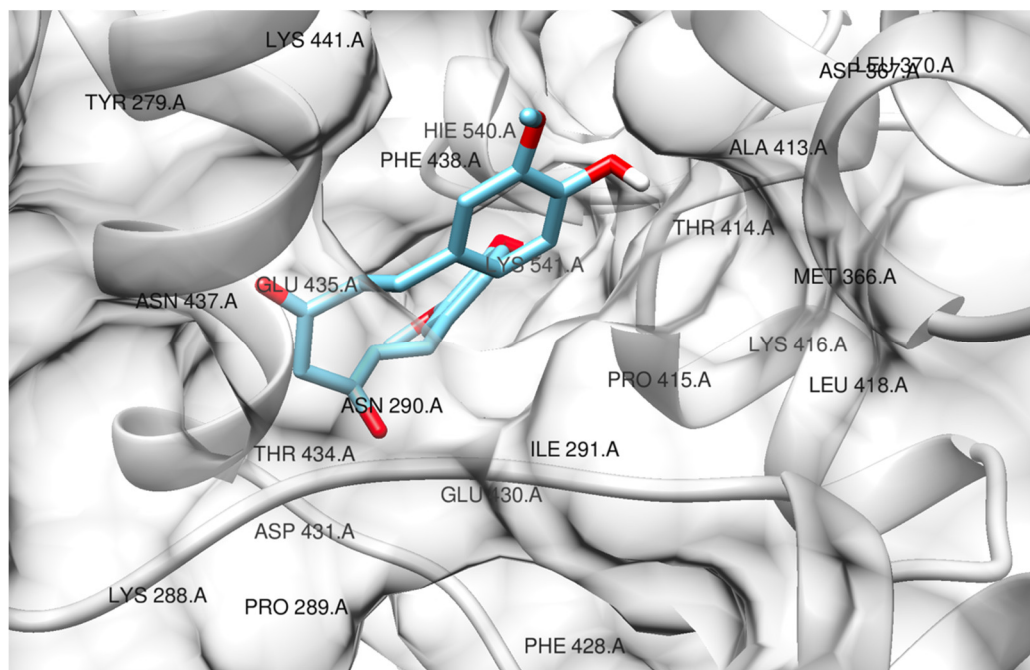

**Figure S14.** Detailed view of the predicted interaction motif of curcumin with ACE2.

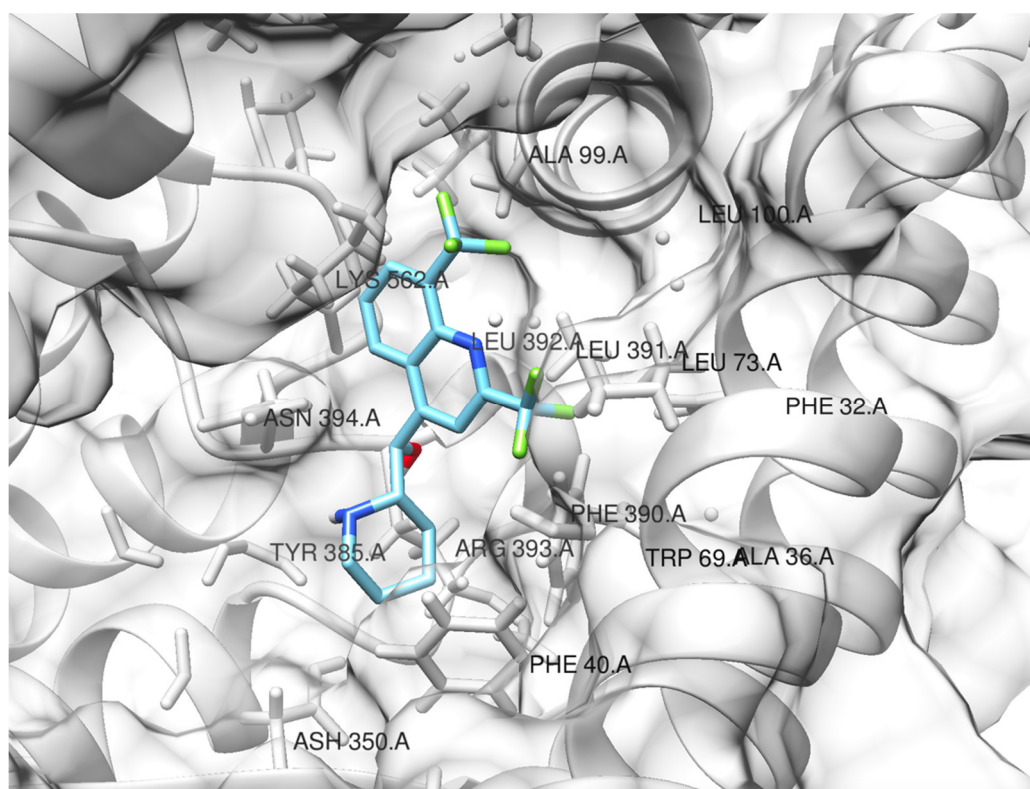

**Figure S15.** Detailed view of the predicted interaction motif of mefloquine with ACE2.



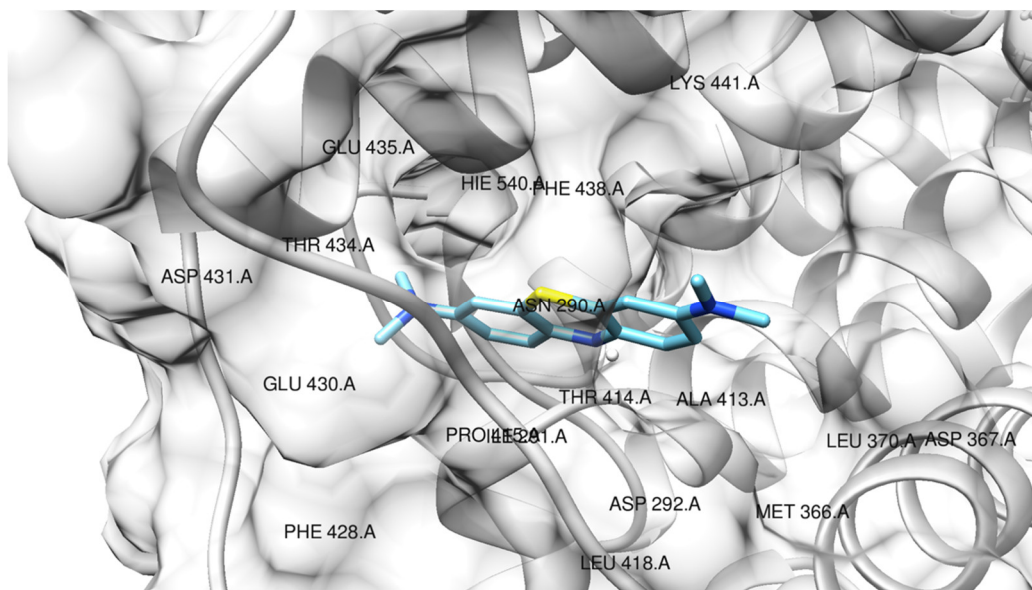

**Figure S16.** Detailed view of the predicted interaction motif of methylene blue with ACE2.

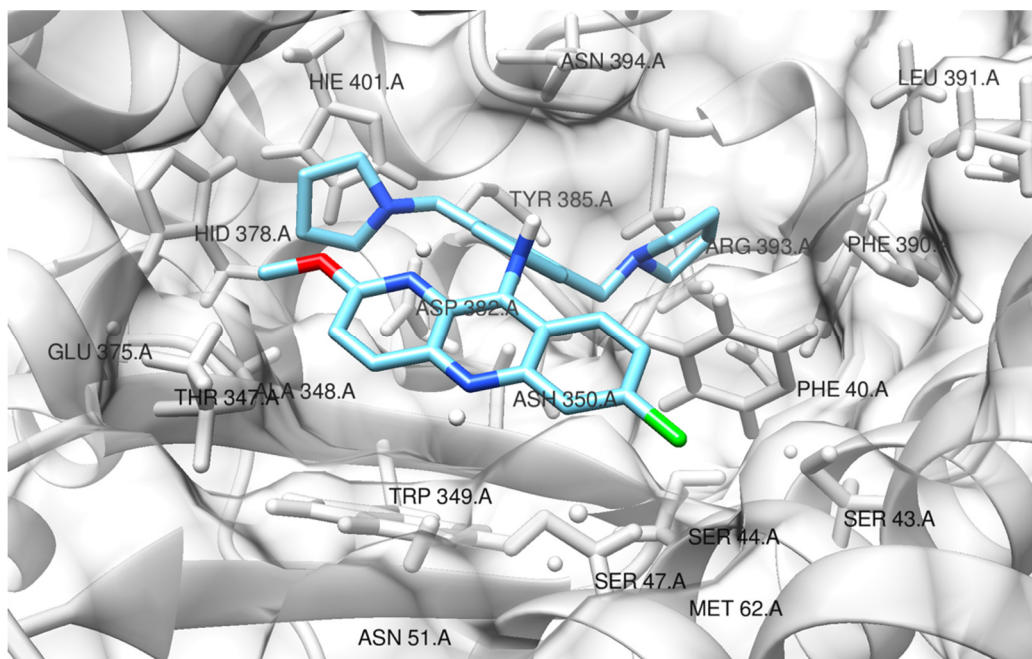

**Figure S17.** Detailed view of the predicted interaction motif of pyronaridine with ACE2.

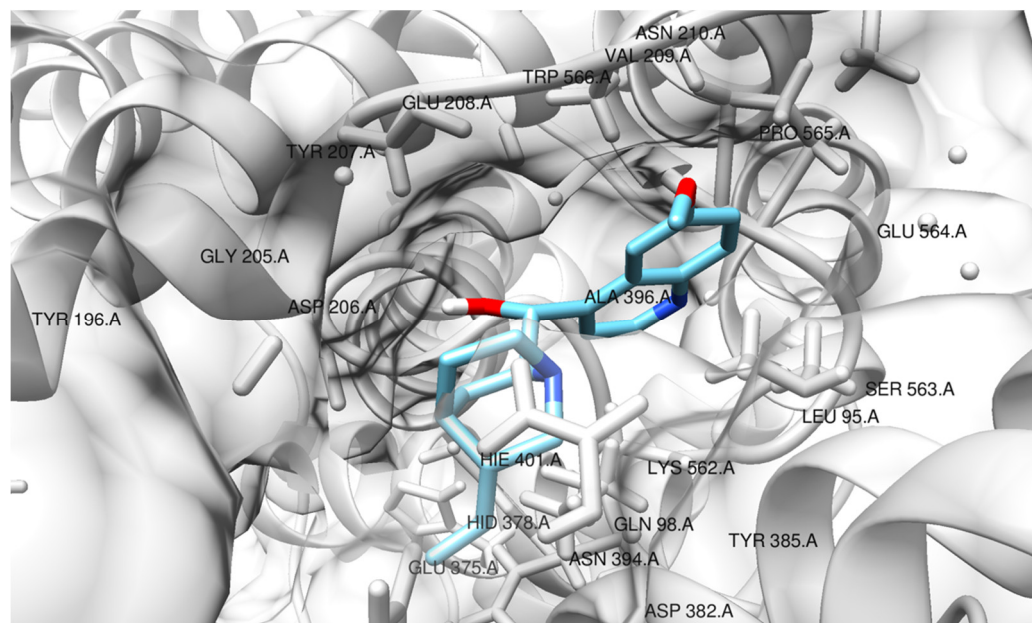

**Figure S18.** Detailed view of the predicted interaction motif of quinine with ACE2.

Bio-layer interferometry

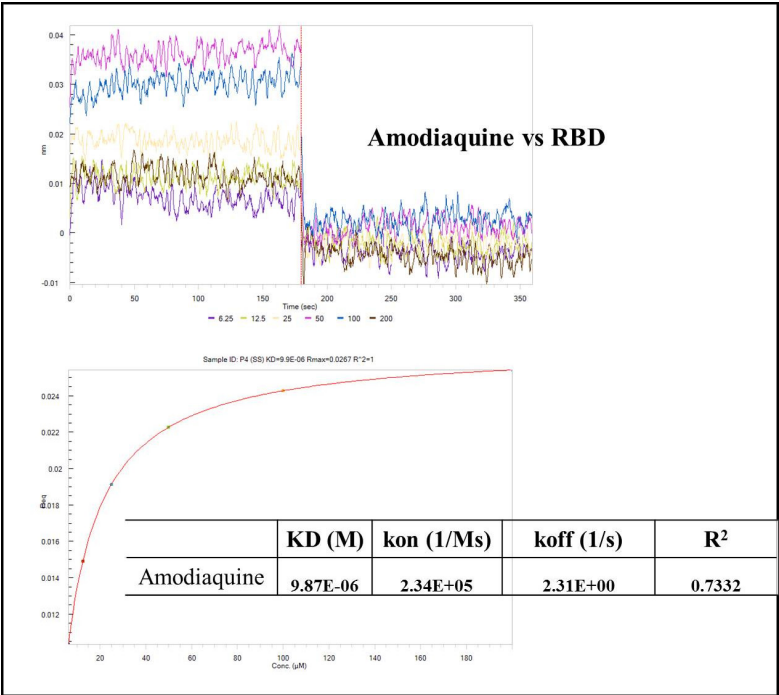

Figure S19. Bio-layer interferometry study for the interaction of amodiaquine with RBD.

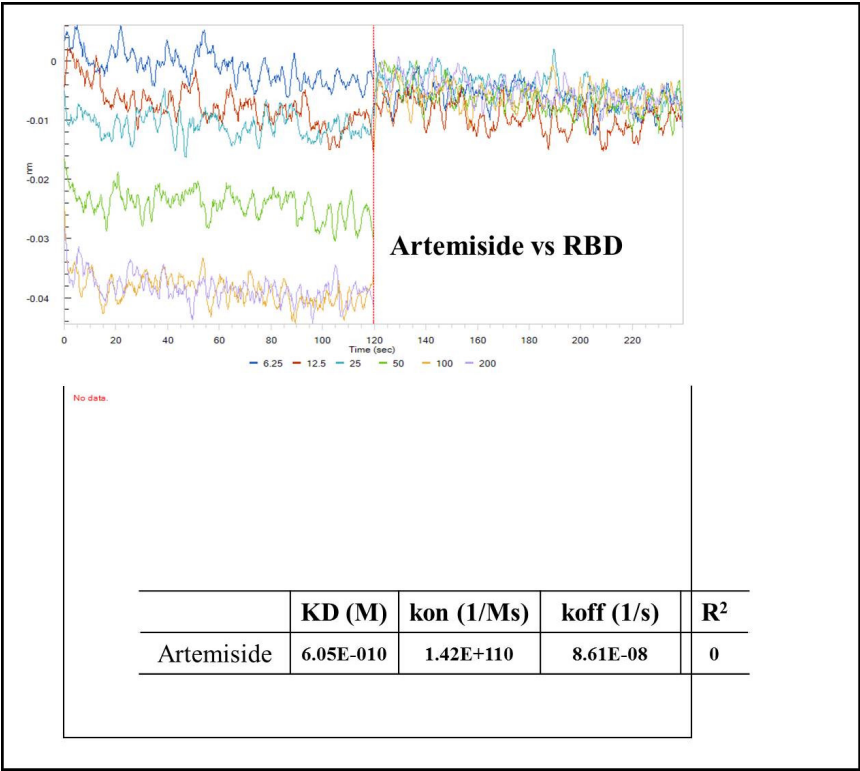

Figure S20. Bio-layer interferometry study for the interaction of artemiside with RBD.



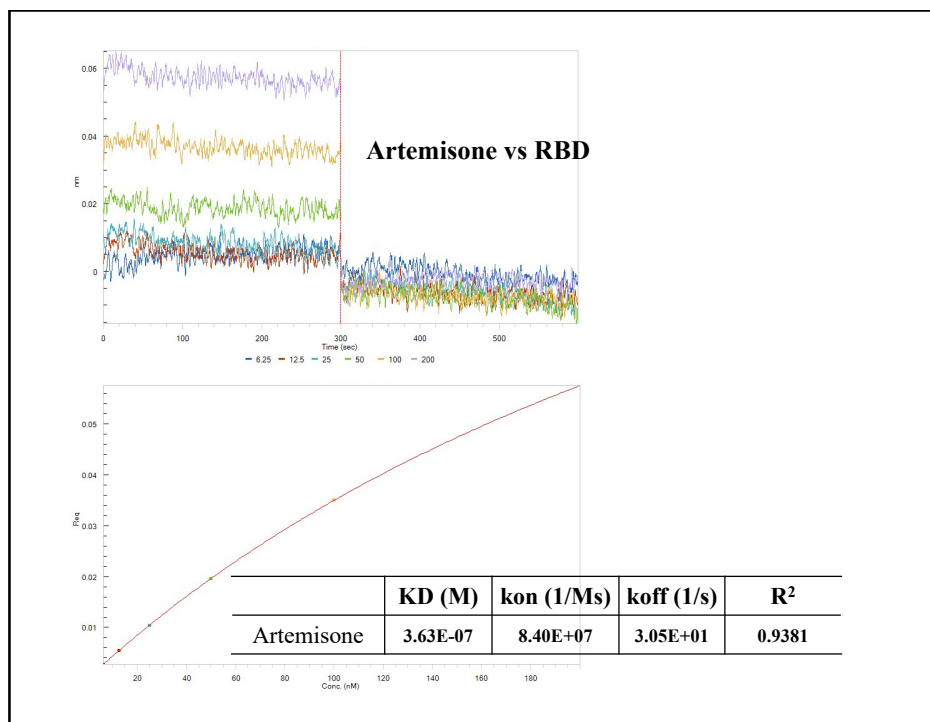

**Figure S21.** Bio-layer interferometry study for the interaction of artemisone with RBD.

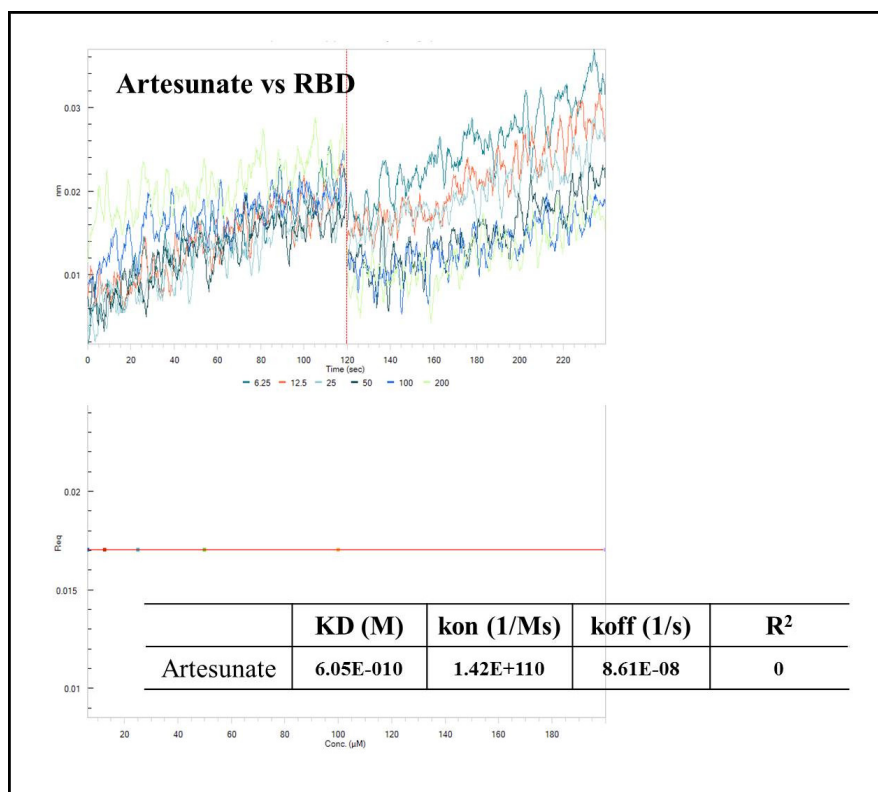

**Figure S22.** Bio-layer interferometry study for the interaction of artesunate with RBD.

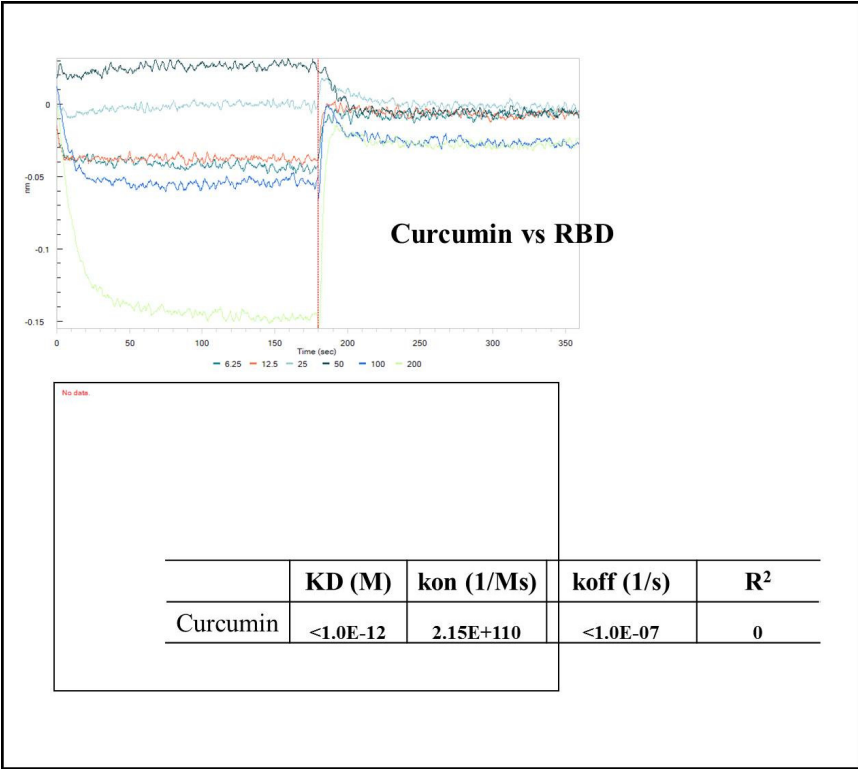

**Figure S23.** Bio-layer interferometry study for the interaction of curcumin with RBD.

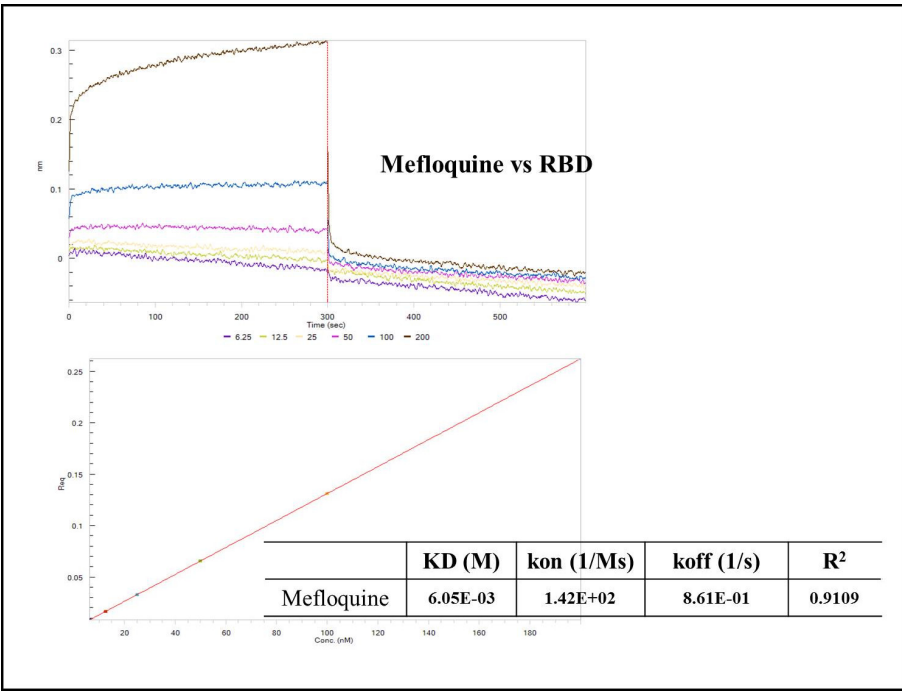

**Figure S24.** Bio-layer interferometry study for the interaction of mefloquine with RBD.

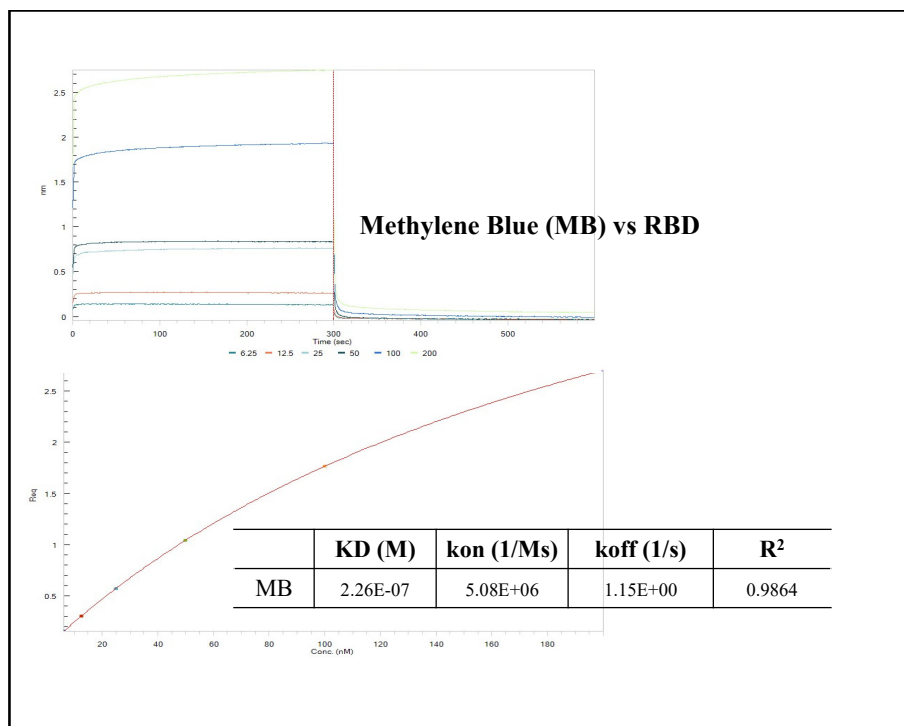

**Figure S25.** Bio-layer interferometry study for the interaction of methylene blue with RBD.

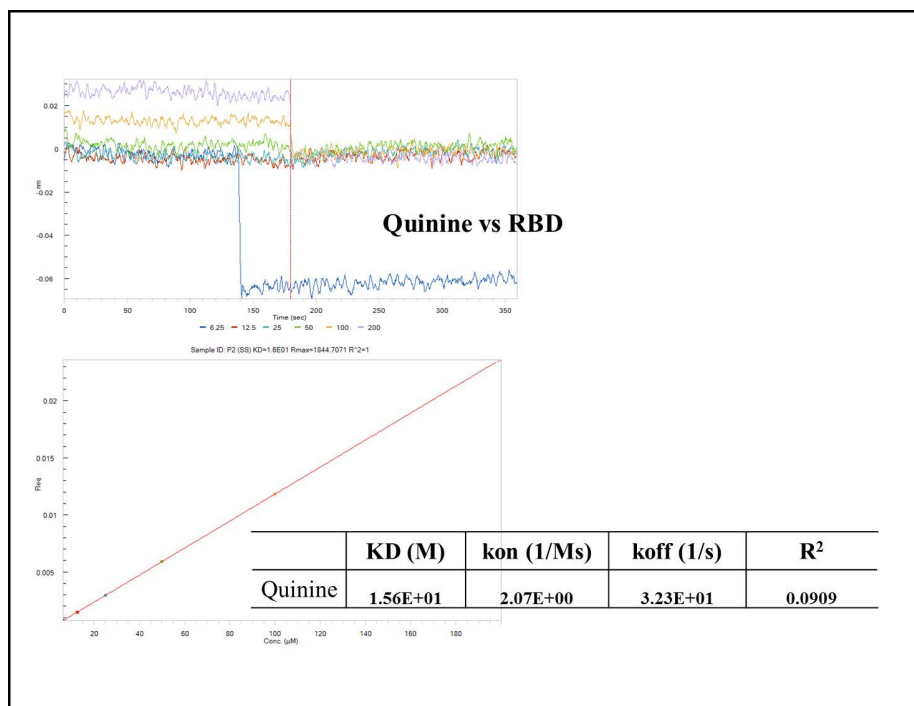

**Figure S26.** Bio-layer interferometry study for the interaction of quinine with RBD.



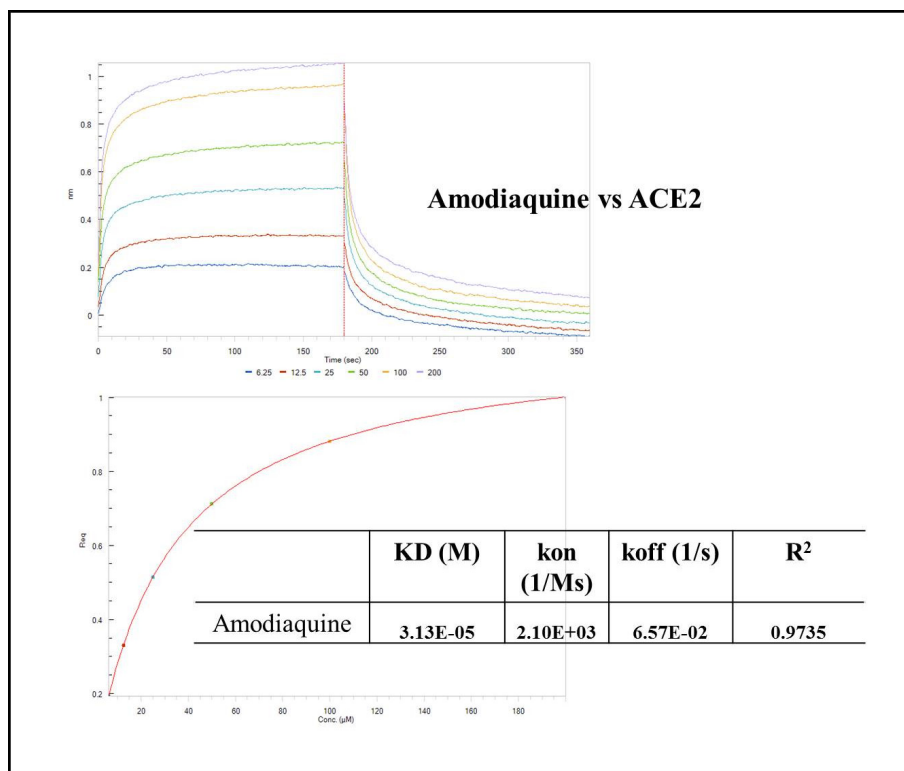

**Figure S27.** Bio-layer interferometry study for the interaction of amodiaquine with ACE2.

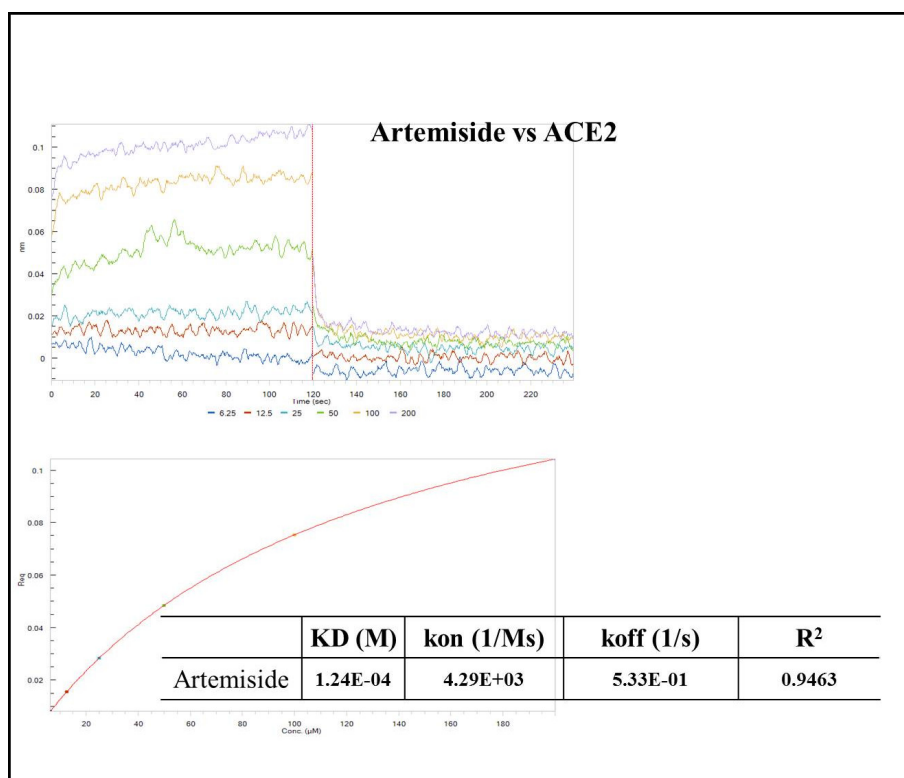

**Figure S28.** Bio-layer interferometry study for the interaction of artemiside with ACE2.

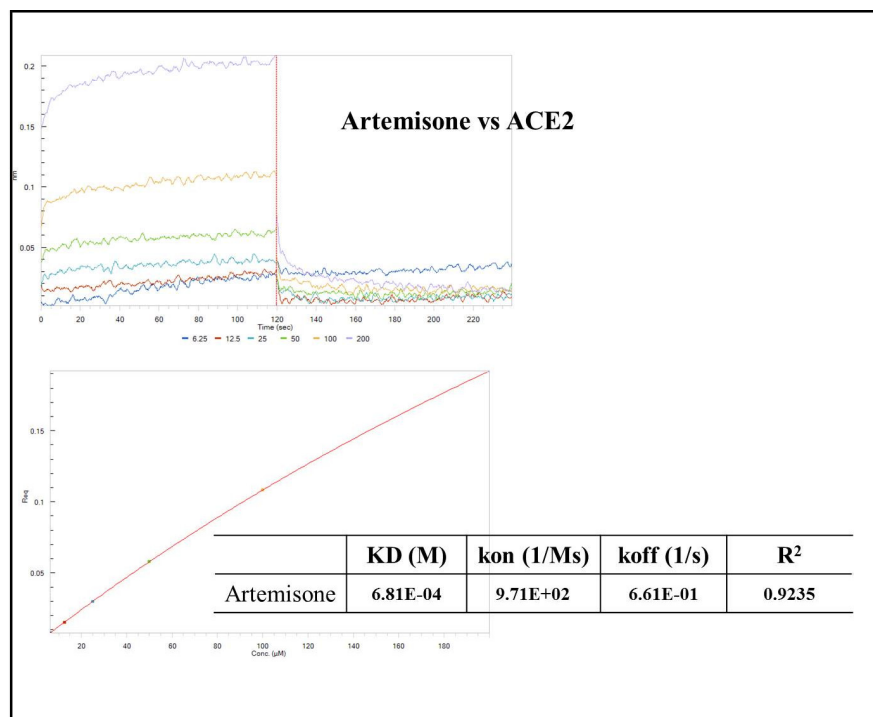

**Figure S29.** Bio-layer interferometry study for the interaction of artemisone with ACE2.

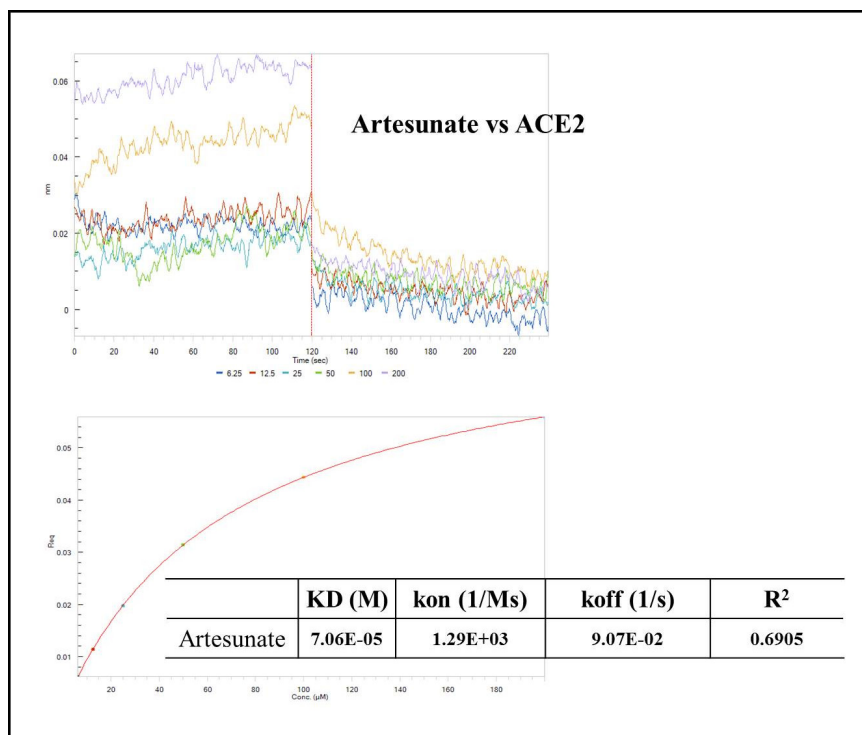

**Figure S30.** Bio-layer interferometry study for the interaction of artesunate with ACE2.

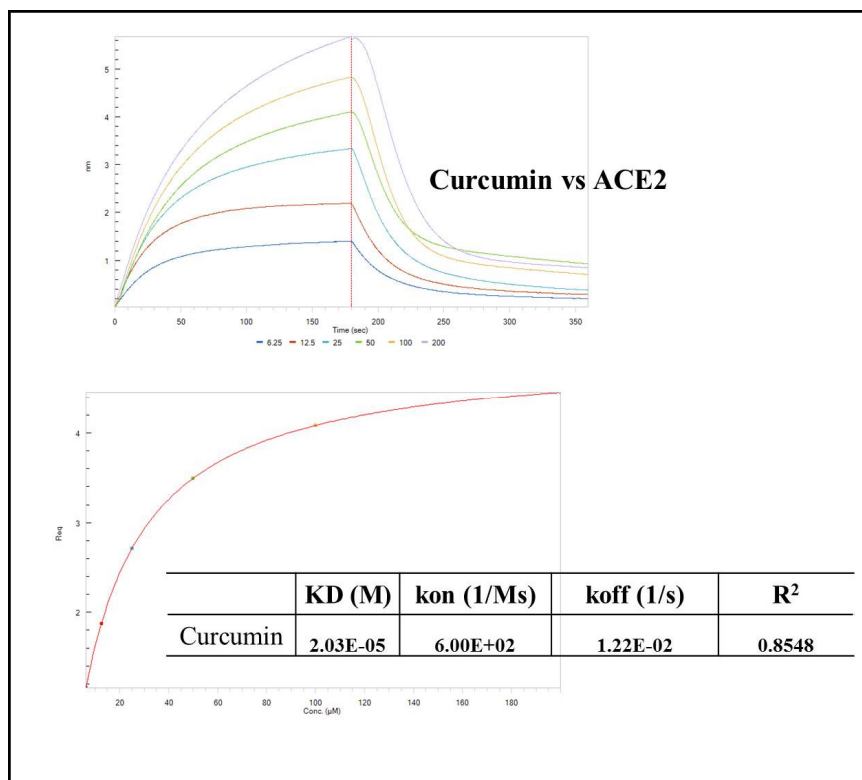

**Figure S31.** Bio-layer interferometry study for the interaction of curcumin with ACE2.

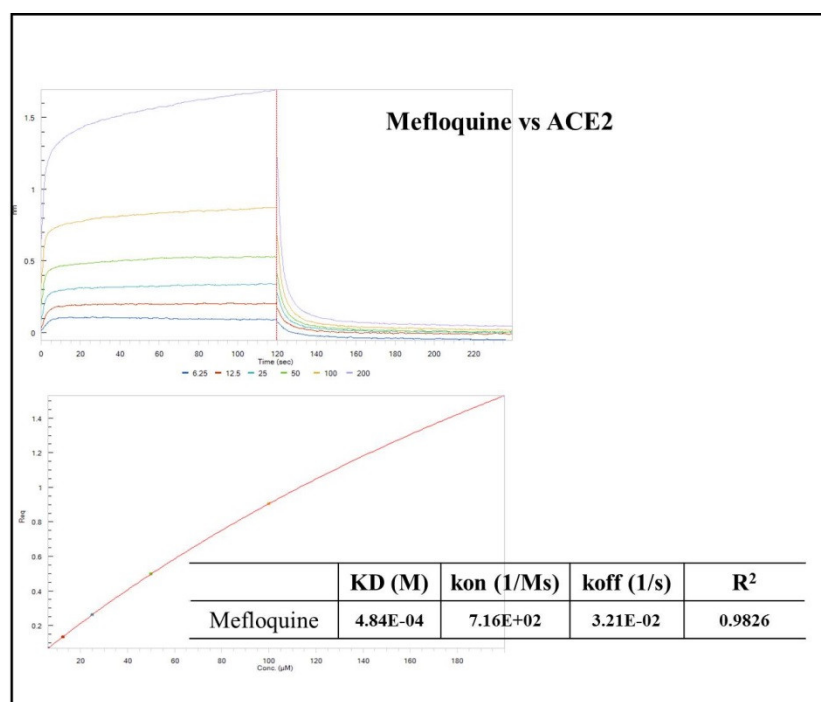

**Figure S32.** Bio-layer interferometry study for the interaction of mefloquine with ACE2.



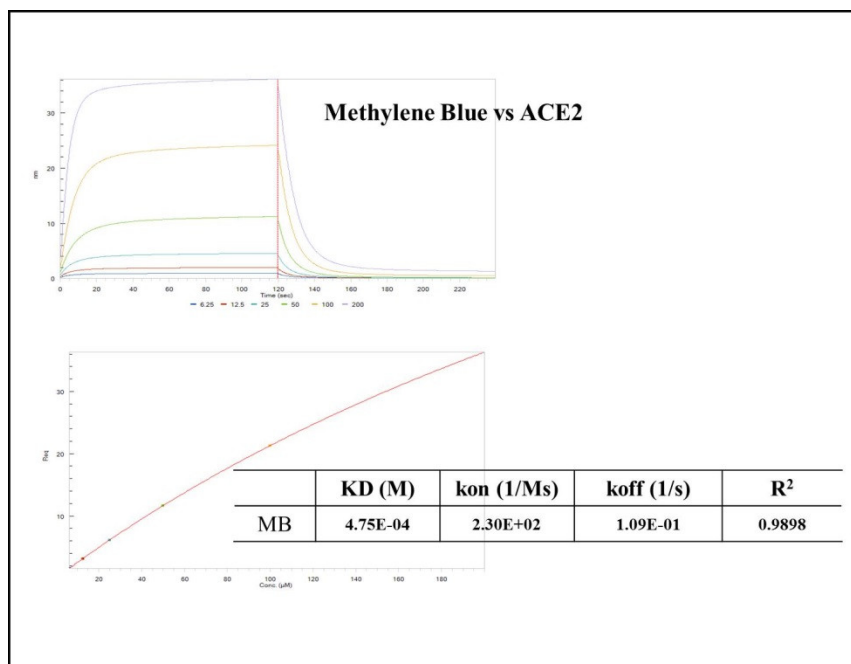

**Figure S33.** Bio-layer interferometry study for the interaction of methylene blue with ACE2.

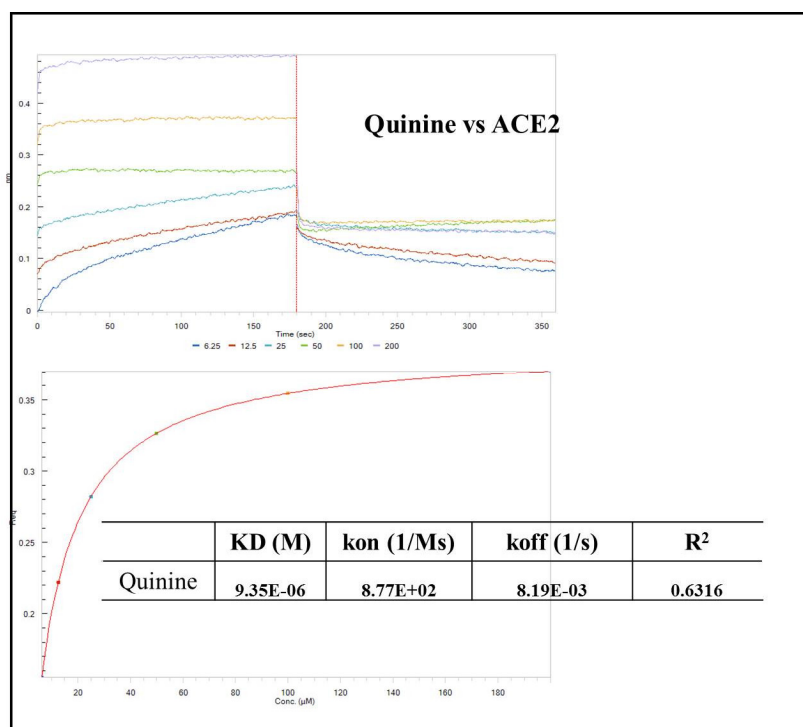

**Figure S34.** Bio-layer interferometry study for the interaction of quinine with ACE2.
